# Supplementary material for: Biological Activities and Phytochemicals of Lungworts (Genus Pulmonaria) Focusing on Pulmonaria officinalis
Source: MDPI journal article supplement (doi:10.3390/app12136678), 2022-07-01
Supplement: s1 [file s1]

**Table S1.** Phytochemicals identified in the lungworts.

| S r . N o. | Compound                                                                     | Class                        | Amount            | Part of plant used                                                      | Reference |
|------------|------------------------------------------------------------------------------|------------------------------|-------------------|-------------------------------------------------------------------------|-----------|
| 1          | 7-Tigloyl-or 7-Seneciolyretronecine                                          | Pyrrolizidine alkaloids (PA) | 2 <sup>a</sup>    | Dried root and rhizome of <i>P. obscura</i> (D RR)                      | [1]       |
| 2          | 2-O-(E)-caffeoyl-D-glyceric acid                                             | Poly phenolic acid (PPA)     | 5.10±0.14 (µg/mg) | Methanolic extract from the aerial part (MEAP) of <i>P. officinalis</i> | [2]       |
|            |                                                                              |                              | 1.24±0.02 (µg/mg) | MEAP of <i>P. obscura</i>                                               |           |
| 3          | 2-O-(E)-caffeoyl-L-threonic acid                                             | PPA                          | 4.52±0.14 (µg/mg) | MEAP of <i>P. officinalis</i>                                           | [3]       |
|            |                                                                              |                              | 3.34±0.11 (µg/mg) | MEAP of <i>P. obscura</i>                                               |           |
| 4          | 3-O-(E)-caffeoyl-glyceric acid                                               | PPA                          | 2.08±0.06 (µg/mg) | MEAP of <i>P. officinalis</i>                                           | [3]       |
|            |                                                                              |                              | Traces            | MEAP of <i>P. obscura</i>                                               |           |
| 5          | 3-O-(E)-caffeoyl-threonic acid                                               | PPA                          | 1.53±0.05 (µg/mg) | MEAP of <i>P. officinalis</i>                                           | [2]       |
|            |                                                                              |                              | 1.18±0.10 (µg/mg) | MEAP of <i>P. obscura</i>                                               |           |
| 6          | 3-O-p-coumaroylquinic acid                                                   | Others                       | 2.29±0.04 (µg/mg) | MEAP of <i>P. officinalis</i> and                                       | [2]       |
|            |                                                                              |                              | 0.87±0.03 (µg/mg) | MEAP of <i>P. obscura</i>                                               |           |
| 7          | 3'-O-(E)-feruloyl- $\alpha$ -sorbopyranosyl-(2'1)- $\alpha$ -glucopyranoside | PPA                          | 0.45±0.01 (µg/mg) | MEAP of <i>P. officinalis</i>                                           | [3]       |
|            |                                                                              |                              | Traces            | MEAP of <i>P. obscura</i>                                               |           |
| 8          | 4-O-(E)-caffeoyl-L-threonic acid                                             | PPA                          | 2.78±0.07 (µg/mg) | MEAP of <i>P. officinalis</i>                                           | [3]       |
|            |                                                                              |                              | 1.50±0.08 (µg/mg) | MEAP of <i>P. obscura</i>                                               |           |

|    |                                    |           |                                               |                                                         |     |
|----|------------------------------------|-----------|-----------------------------------------------|---------------------------------------------------------|-----|
| 9  | 4-O-p-coumaroylquinic acid         | Others    | 13.9±0.8 (µg/mg)                              | MEAP of <i>P. officinalis</i>                           | [3] |
|    |                                    |           | Traces                                        | MEAP of <i>P. obscura</i>                               |     |
| 10 | 5-O-p-coumaroylquinic acid         | Others    | 1.88±0.04 (µg/mg)                             | MEAP of <i>P. officinalis</i>                           | [2] |
|    |                                    |           | 0.93±0.04 (µg/mg)                             | MEAP of <i>P. obscura</i>                               |     |
| 11 | 7- Isobutyryllycopsamine           | PA        | 15 <sup>a</sup>                               | DRR                                                     | [1] |
| 12 | 7- Tigloylintermedine              | PA        | 100 <sup>a</sup>                              | DRR                                                     | [1] |
| 13 | 7- Tigloyllycopsamine (Symphytine) | PA        | 85 <sup>a</sup>                               | DRR                                                     | [1] |
| 14 | 7-(2-Methylbutyryl)- lycopsamine   | PA        | 8 <sup>a</sup>                                | DRR                                                     | [1] |
| 15 | 7-(2-Methylbutyryl)-intermedine,   | PA        | 5 <sup>a</sup>                                | DRR                                                     | [1] |
| 16 | 7-(3-Methylbutyryl)- lycopsamine,  | PA        | 4 <sup>a</sup>                                | DRR                                                     | [1] |
| 17 | 7-(3-Methylbutyryl)-intermedine    | PA        | 3 <sup>a</sup>                                | DRR                                                     | [1] |
| 18 | 7-Acetyl-9-(RI=1833)-monoester     | PA        | 5 <sup>a</sup>                                | DRR                                                     | [1] |
| 19 | 7-Acetylintermedine                | PA        | 80 <sup>a</sup>                               | DRR                                                     | [1] |
| 20 | 7-Acetyllycopsamine,               | PA        | 100 <sup>a</sup>                              | DRR                                                     | [1] |
| 21 | 7-Isobutyrylintermedine            | PA        | 20 <sup>a</sup>                               | DRR                                                     | [1] |
| 22 | 7-Propionylintermedine             | PA        | 15 <sup>a</sup>                               | DRR                                                     | [1] |
| 23 | 7-Propionyllycopsamine             | PA        | 10 <sup>a</sup>                               | DRR                                                     | [1] |
| 24 | 7-Senecioylintermedine             | PA        | 20 <sup>a</sup>                               | DRR                                                     | [1] |
| 25 | 7-Senecioyllycopsamine             | PA        | 15 <sup>a</sup>                               | DRR                                                     | [1] |
| 26 | 9-Monoester                        | PA        | 4 <sup>a</sup>                                | DRR                                                     | [1] |
| 27 | Acacetin                           | Flavanone | NA                                            | Methanolic extract of leaves of <i>P. officinalis</i>   | [4] |
| 28 | Actinidioionoside                  | Lignan    | 26.1±6.8 (µg/mg)                              | MEAP of <i>P. officinalis</i> and                       | [2] |
|    |                                    |           | Traces                                        | MEAP of <i>P. obscura</i>                               |     |
| 29 | Allantoin                          | Others    | 1.04 ± 0.22 mg g <sup>-1</sup> air-dry matter | Methanolic extract of shoot (MES) from <i>P. mollis</i> | [5] |
|    |                                    |           | 9.75 ± 0.25 mg g <sup>-1</sup> air-dry matter | Methanolic extract of root (MER) from <i>P. mollis</i>  |     |

|    |                       |           |                                                |                                                       |     |
|----|-----------------------|-----------|------------------------------------------------|-------------------------------------------------------|-----|
|    |                       |           | 2.37 ± 0.37 mg g <sup>-1</sup> air-dry matter  | MES from <i>P. obscura</i>                            |     |
|    |                       |           | 13.14 ± 3.74 mg g <sup>-1</sup> air-dry matter | MER from <i>P. obscura</i>                            |     |
| 30 | Apigenin              | Flavones  | 18 <sup>b</sup>                                | Root leaves of <i>P. mollis</i>                       | [6] |
|    |                       | Flavones  | NA                                             | Ethanolic extract <i>P. officinalis</i> (EEPO)        | [7] |
| 31 | apigenin 7-glucoside, | Flavones  | NA                                             | Methanolic extract of leaves of <i>P. officinalis</i> | [4] |
| 32 | Astragalin            | Flavonoid | 146.6±3.2 (µg/mg)                              | MEAP of <i>P. officinalis</i>                         | [2] |
|    |                       |           | Traces                                         | MEAP of <i>P. obscura</i>                             |     |
| 33 | Caffeic acid          | PPA       | 2.31± 0.11 (µg/mg)                             | MEAP of <i>P. officinalis</i>                         | [3] |
|    |                       |           | Traces                                         | MEAP of <i>P. obscura</i>                             |     |
|    |                       |           | 3.94 <sup>b</sup>                              | Floriferous shoots of <i>P. mollis</i>                | [6] |
|    |                       |           | 12.94 (µg/ml) in aqueous extract               | AEPO                                                  | [7] |
|    |                       |           | 3.36 (µg/ml) in ethanol extract                | EEPO                                                  |     |
| 34 | Catechin              | Others    | 2.22 <sup>b</sup>                              | in floriferous shoots                                 | [6] |
|    |                       |           | 1.8 <sup>b</sup>                               | in root leaves                                        |     |
| 35 | Chlorogenic acid      | PPA       | 4.32± 0.11 (µg/mg)                             | MEAP of <i>P. officinalis</i> and                     | [3] |

|    |                        |                      |                                         |                                                       |            |
|----|------------------------|----------------------|-----------------------------------------|-------------------------------------------------------|------------|
|    |                        |                      | 4.87±0.13 (µg/mg)                       | MEAP of <i>P. obscura</i>                             |            |
|    |                        |                      | NA                                      | Methanolic extract of leaves of <i>P. officinalis</i> | [4]        |
|    |                        |                      | 3.75 <sup>b</sup>                       | in floriferous shoots                                 | [6]        |
|    |                        |                      | 0.94 <sup>b</sup>                       | in root leaves                                        |            |
|    |                        |                      | 3.53 (µg/ml) in aqueous extract         | AEPO                                                  | [7]        |
|    |                        |                      | 3.03 (µg/ml) in ethanol extract         | EEPO                                                  |            |
| 36 | Cichoric acid          | PPA                  | 3.4 <sup>b</sup>                        | in root leaves                                        | [6]        |
| 37 | Cryptochlorogenic acid | PPA                  | 0.22±0.01 (µg/mg)                       | MEAP of <i>P. officinalis</i> and                     | [2]        |
|    |                        |                      | 0.74±0.03 (µg/mg)                       | MEAP of <i>P. obscura</i>                             |            |
| 38 | Danshensu              | PPA                  | 1.52±0.06 (µg/mg)                       | MEAP of <i>P. officinalis</i> and                     | [3]<br>[2] |
|    |                        |                      | 2.40±0.10 (µg/mg)                       | MEAP of <i>P. obscura</i>                             |            |
| 39 | Dihydroquercetin       | Flavanols            | 8.11 <sup>b</sup>                       | floriferous shoots                                    | [6]        |
| 40 | Ferulic acid           | Hydroxycinnamic acid | 22.5 <sup>b</sup>                       | floriferous shoots                                    | [6]        |
|    |                        |                      | NA                                      | AEPO                                                  | [7]        |
| 41 | Gallic acid            | Phenolic acid        | NA                                      | Methanolic extract of leaves of <i>P. officinalis</i> | [4]        |
|    |                        |                      | 20.6 <sup>b</sup> in floriferous shoots | Floriferous shoot of <i>P. mollis</i>                 | [6]        |

|    |                         |           |                                   |                                                       |     |
|----|-------------------------|-----------|-----------------------------------|-------------------------------------------------------|-----|
|    |                         |           | 24.23 <sup>b</sup> in root leaves | root leaves of <i>P. mollis</i>                       |     |
|    |                         |           | 0.97 (µg/ml) in aqueous extract   | AEPO                                                  | [7] |
| 42 | Globoidnan A            | Lignan    | 0.57-0.02 (µg/mg)                 | MEAP of <i>P. officinalis</i>                         | [3] |
|    |                         |           | 4.10-0.17 (µg/mg)                 | MEAP of <i>P. obscura</i>                             |     |
| 43 | Globoidnan B            | Lignan    | 24.16±3.33 (µg/mg)                | MEAP of <i>P. officinalis</i>                         | [3] |
|    |                         |           | 29.79±4.46 (µg/mg)                | MEAP of <i>P. obscura</i>                             |     |
| 44 | hesperetin,             | Flavanone | NA                                | Methanolic extract of leaves of <i>P. officinalis</i> | [4] |
| 45 | hesperidin              | Flavanone | NA                                | Methanolic extract of leaves of <i>P. officinalis</i> | [4] |
| 46 | Hyperoside              | Flavonoid | NA                                | Methanolic extract of leaves of <i>P. officinalis</i> | [4] |
|    |                         | flavonoid | 0.54 (µg/ml) in aqueous extract   | AEPO                                                  | [7] |
|    |                         |           | 3.97 (µg/ml) in ethanol extract   | EEPO                                                  |     |
| 47 | Intermedine             | PA        | 90 <sup>a</sup>                   | DRR                                                   | [1] |
| 48 | Isorhamnetin 315        | flavonols | NA                                | EEPO                                                  | [7] |
| 49 | Isosalvianolic acid A   | PPA       | 0.7±0.1 (µg/mg)                   | MEAP of <i>P. officinalis</i>                         | [2] |
|    |                         |           | Traces                            | MEAP of <i>P. obscura</i>                             |     |
| 50 | Isosalvianolic acid A-1 | PPA       | Traces                            | MEAP of <i>P. officinalis</i>                         | [3] |

|    |                                                   |            |                     |                               |     |
|----|---------------------------------------------------|------------|---------------------|-------------------------------|-----|
|    |                                                   |            | Traces              | MEAP of <i>P. obscura</i>     |     |
| 51 | Isosalvianolic acid A isomer                      | PPA        | 1.8±0.3 (µg/mg)     | MEAP of <i>P. officinalis</i> | [2] |
|    |                                                   |            | Traces              | MEAP of <i>P. obscura</i>     |     |
| 52 | Kaempferol                                        | Flavonols  | 1,46 <sup>b</sup>   | floriferous shoots            | [6] |
|    |                                                   | Flavonols  | NA                  | AEPO                          | [7] |
|    |                                                   |            | NA                  | EEPO                          |     |
| 53 | Kaempferol 3-O-(6-O-malonyl)- <i>b</i> -glucoside | Flavonols  | 731.6±45.5 (µg/mg)  | MEAP of <i>P. officinalis</i> | [3] |
|    |                                                   |            | 0.40±0.08 (µg/mg)   | MEAP of <i>P. obscura</i>     |     |
| 54 | kaempferol 3-O-glucoside                          | Flavonoid  | NA                  | MEAP of <i>P. officinalis</i> | [8] |
| 55 | kaempferol aglycones                              | flavonoids | NA                  | MEAP of <i>P. officinalis</i> | [8] |
| 56 | Lithospermic acid A                               | PPA        | 44.20± 0.05 (µg/mg) | MEAP of <i>P. officinalis</i> | [2] |
|    |                                                   |            | 80.13±6.44 (µg/mg)  | MEAP of <i>P. obscura</i>     |     |
| 57 | Luteolin                                          | Flavones   | NA                  | EEPO                          | [7] |
| 58 | Luteolin 7- glucoside                             | Flavones   | 1.16 <sup>b</sup>   | in root leaves                | [6] |

|    |                     |                      |                    |                                                       |     |
|----|---------------------|----------------------|--------------------|-------------------------------------------------------|-----|
| 59 | Lycoperodine-1      | Others               | 1.20±0.04 (µg/mg)  | MEAP of <i>P. officinalis</i>                         | [2] |
|    |                     |                      | Traces             | MEAP of <i>P. obscura</i>                             |     |
| 60 | Lycopsamine,        | PA                   | 100 <sup>a</sup>   | DRR                                                   | [1] |
| 61 | Menisdaurin         | Others               | 39.08±1.56 (µg/mg) | MEAP of <i>P. officinalis</i>                         | [3] |
|    |                     |                      | 16.36±0.43 (µg/mg) | MEAP of <i>P. obscura</i>                             |     |
| 62 | Monardic acid A     | PPA                  | 17.56±2.77 (µg/mg) | MEAP of <i>P. officinalis</i> and                     | [2] |
|    |                     |                      | 42.99±5.04 (µg/mg) | MEAP of <i>P. obscura</i>                             |     |
| 63 | myricetin           | Flavonoid            | NA                 | Methanolic extract of leaves of <i>P. officinalis</i> | [4] |
| 64 | naringenin,         | Flavanone            | NA                 | Methanolic extract of leaves of <i>P. officinalis</i> | [4] |
| 65 | Neochlorogenic acid | PPA                  | 0.04±0.00 (µg/mg)  | MEAP of <i>P. officinalis</i>                         | [2] |
|    |                     |                      | 0.37±0.01 (µg/mg)  | MEAP of <i>P. obscura</i>                             |     |
|    |                     |                      | 2.58 <sup>b</sup>  | floriferous shoots                                    | [6] |
|    |                     |                      | 2.97 <sup>b</sup>  | root leaves                                           |     |
| 66 | Nicotiflorin        | Flavonols            | 184.8±4.5 (µg/mg)  | MEAP of <i>P. officinalis</i>                         | [3] |
|    |                     |                      | Traces             | MEAP of <i>P. obscura</i>                             |     |
| 67 | Nicotiflorin isomer | Flavonols            | 3.1±0.3 (µg/mg)    | MEAP of <i>P. officinalis</i>                         | [3] |
|    |                     |                      | Traces             | MEAP of <i>P. obscura</i>                             |     |
| 68 | p-Coumaric acid 163 | Hydroxycinnamic acid | 0.46 (µg/ml)       | AEPO                                                  | [7] |

|    |                                           |               |                                                 |                                   |     |
|----|-------------------------------------------|---------------|-------------------------------------------------|-----------------------------------|-----|
| 69 | p-hydroxybenzoic acid                     | Phenolic acid | Shoot = nd                                      | MES from <i>P. mollis</i>         | [5] |
|    |                                           |               | Root = nd                                       | MER from <i>P. mollis</i>         |     |
|    |                                           |               | 0.173 ± 0.003 mg g <sup>-1</sup> air-dry matter | MES from <i>P. obscura</i>        |     |
|    |                                           |               | Root = nd                                       | MER from <i>P. obscura</i>        |     |
| 70 | Pulmitric acid A                          | PPA           | Traces                                          | MEAP of <i>P. officinalis</i>     | [2] |
|    |                                           |               | Traces                                          | MEAP of <i>P. obscura</i>         |     |
| 71 | Pulmitric acid B                          | PPA           | Traces                                          | MEAP of <i>P. officinalis</i>     | [3] |
|    |                                           |               | Traces                                          | MEAP of <i>P. obscura</i>         |     |
| 72 | Pulmonarioside A                          |               | 18.0±1.5 (µg/mg) ( <i>P. officinalis</i> )      | MEAP of <i>P. officinalis</i>     | [3] |
|    |                                           |               | Traces                                          | MEAP of <i>P. obscura</i>         |     |
| 73 | Pulmonarioside B                          |               | 147.5±12.8 (µg/mg)                              | MEAP of <i>P. officinalis</i>     | [3] |
|    |                                           |               | 0.50-0.03 (µg/mg)                               | MEAP of <i>P. obscura</i>         |     |
| 74 | Quercetin 3-O-glucoside                   | Flavonols     | NA                                              | MEAP of <i>P. officinalis</i>     | [8] |
| 75 | Quercetin 3-O-rhamnoglucoside             | Flavonols     | NA                                              | MEAP of <i>P. officinalis</i>     | [8] |
| 76 | Quercetin 3-O-(6''-O-malonyl)-β-glucoside | Flavonols     | 2.82±0.15 (µg/mg)                               | MEAP of <i>P. officinalis</i>     | [2] |
|    |                                           |               | 4.10±0.18 (µg/mg)                               | MEAP of <i>P. obscura</i>         |     |
| 77 | Quercetin 3-O-rhamnoside                  | Flavonols     |                                                 |                                   | [8] |
| 78 | Quercetin 3-O-β-glucoside                 | Flavonols     | 0.33± 0.02 (µg/mg)                              | MEAP of <i>P. officinalis</i> and | [2] |



|    |                                |            |                                              |                               |     |
|----|--------------------------------|------------|----------------------------------------------|-------------------------------|-----|
|    |                                |            | 0.62±0.01 (µg/mg)                            | MEAP of <i>P. obscura</i>     |     |
| 79 | Quercetin                      | Flavonols  | NA                                           | EEPO                          | [7] |
| 80 | Kaempferol aglycones           | flavonoids | NA                                           | MEAP of <i>P. officinalis</i> | [8] |
| 81 | Rosmarinic acid                | PPA        | 159.28±17.09(µg/mg)                          | MEAP of <i>P. officinalis</i> | [2] |
|    |                                |            | 301.46±35.04 (µg/mg)                         | MEAP of <i>P. obscura</i>     |     |
|    |                                |            | 36.6 ± 1.2 mg g <sup>-1</sup> air-dry matter | MES from <i>P. mollis</i>     | [5] |
|    |                                |            | 7.5 ± 0.24 mg g <sup>-1</sup> air-dry matter | MER from <i>P. mollis</i>     |     |
|    |                                |            | 15.6 ± 2.0 mg g <sup>-1</sup> air-dry matter | MES from <i>P. obscura</i>    |     |
|    |                                |            | 7.9 ± 0.38 mg g <sup>-1</sup> air-dry matter | MER from <i>P. obscura</i>    |     |
|    |                                |            | 63.05 ±1.12 µg/mg of d.w                     | MEAP of <i>P. officinalis</i> | [9] |
|    |                                |            | 71.54 ± 9.12 µg/mg of d.w                    | MEAP of <i>P. obscura</i>     |     |
|    |                                |            | 41.94 (µg/ml) in aqueous extract             | AEPO                          | [7] |
|    |                                |            | 124.59 (µg/ml) in ethanol extract            | EEPO                          |     |
| 82 | Rosmarinic acid methyl ester s | Polyphenol | 15.8±1.4(µg/mg)                              | MEAP of <i>P. officinalis</i> | [3] |
|    |                                |            | Traces                                       | MEAP of <i>P. obscura</i>     |     |

|    |                                          |           |                                 |                                                       |     |
|----|------------------------------------------|-----------|---------------------------------|-------------------------------------------------------|-----|
| 83 | Rutin                                    | Flavanols | 369.9±9.4 (µg/mg)               | MEAP of <i>P. officinalis</i>                         | [2] |
|    |                                          |           | Traces                          | MEAP of <i>P. obscura</i>                             |     |
|    |                                          |           | NA                              | Methanolic extract of leaves of <i>P. officinalis</i> | [4] |
|    |                                          |           | 0.20 (µg/ml) in aqueous extract | AEPO                                                  | [7] |
|    |                                          |           | 8.76 (µg/ml) in ethanol extract | EEPO                                                  |     |
| 84 | Salvianolic acid H                       | PPA       | 26.23±0.75 (µg/mg)              | MEAP of <i>P. officinalis</i>                         | [2] |
|    |                                          |           | 8.97±0.82 (µg/mg)               | MEAP of <i>P. obscura</i>                             |     |
| 85 | Salvianolic acid H-9''-methylester       | PPA       | 0.79±0.02 (µg/mg)               | MEAP of <i>P. officinalis</i>                         | [2] |
|    |                                          |           | 3.87±0.11 (µg/mg)               | MEAP of <i>P. obscura</i>                             |     |
| 86 | Shimobashiric acid C                     | PPA       | 5.46± 0.17 (µg/mg)              | MEAP of <i>P. officinalis</i>                         | [3] |
|    |                                          |           | 7.46±0.17 (µg/mg)               | MEAP of <i>P. obscura</i>                             |     |
| 87 | Trachelanthamidine                       | PA        | 2 <sup>a</sup>                  | DRR                                                   | [1] |
| 88 | Trachelanthamidine/Isoretronecanol-ester | PA        | 9 <sup>a</sup>                  | DRR                                                   | [1] |
| 89 | Vicenin                                  | Flavonoid | 1.79 <sup>b</sup>               | in root leaves                                        | [6] |
| 90 | Yunnaneic acid B                         | PPA       | 22.65- 1.49 (µg/mg)             | MEAP of <i>P. officinalis</i>                         | [2] |
|    |                                          |           | 23.65-0.52 (µg/mg)              | MEAP of <i>P. obscura</i>                             |     |

|    |                    |     |                                                        |                               |     |
|----|--------------------|-----|--------------------------------------------------------|-------------------------------|-----|
|    |                    |     | 1.94 ± 0.07 µg/m<br>g of d.w ( <i>P. officinalis</i> ) | MEAP of <i>P. officinalis</i> | [9] |
|    |                    |     | 3.35 ± 0.82 µg/m<br>g of d.w                           | MEAP of <i>P. obscura</i>     |     |
| 91 | Yunnaneic acid E   | PPA | 12.07±0.33 (µg/m<br>g)                                 | MEAP of <i>P. officinalis</i> | [3] |
|    |                    |     | 27.32±0.23 (µg/m<br>g)                                 | MEAP of <i>P. obscura</i>     |     |
| 92 | Yunnaneic acid E-1 | PPA | Traces ( <i>P. officinalis</i> )                       | MEAP of <i>P. officinalis</i> | [3] |
|    |                    |     | Traces ( <i>P. obscura</i> )                           | MEAP of <i>P. obscura</i>     |     |

<sup>a</sup> Numbers indicate the percentage abundance relative to the highest peak per sample.

<sup>b</sup> Relative amount in percent.

## References

1. Haberer, W.; Witte, L.; Hartmann, T.; Dobler, S. Pyrrolizidine alkaloids in *Pulmonaria obscura*. *Planta medica* **2002**, *68*, 480-482.
2. Krzyżanowska-Kowalczyk, J.; Pecio, Ł.; Mołdoch, J.; Ludwiczuk, A.; Kowalczyk, M. Novel phenolic constituents of *pulmonaria officinalis* l. Lc-ms/ms comparison of spring and autumn metabolite profiles. *Molecules* **2018**, *23*, 2277.
3. Krzyżanowska-Kowalczyk, J.; Kowalczyk, M.; Ponczek, M.B.; Pecio, Ł.; Nowak, P.; Kolodziejczyk-Czepas, J. *Pulmonaria obscura* and *pulmonaria officinalis* extracts as mitigators of peroxynitrite-induced oxidative stress and cyclooxygenase-2 inhibitors—in vitro and in silico studies. *Molecules* **2021**, *26*, 631.
4. Hawrył, M.A.; Waksmundzka-Hajnos, M. Micro 2D-TLC of selected plant extracts in screening of their composition and antioxidative properties. *Chromatographia* **2013**, *76*, 1347-1352.
5. Dresler, S.; Szymczak, G.; Wójcik, M. Comparison of some secondary metabolite content in the seventeen species of the Boraginaceae family. *Pharmaceutical biology* **2017**, *55*, 691-695.
6. Kruglov, D.; Fursa, N. Phenolic compounds of *Pulmonaria mollis*. *Обзоры по клинической фармакологии и лекарственной терапии* **2012**, *10*, 71.

7. Neagu, E.; Radu, G.L.; Albu, C.; Paun, G. Antioxidant activity, acetylcholinesterase and tyrosinase inhibitory potential of *Pulmonaria officinalis* and *Centarium umbellatum* extracts. *Saudi journal of biological sciences* **2018**, *25*, 578-585.
8. Brantner, A.; Kartnig, T. Flavonoid glycosides from aerial parts of *Pulmonaria officinalis*. *Planta medica* **1995**, *61*, 582-582.
9. Krzyzanowska-Kowalczyk, J.; Kolodziejczyk-Czepas, J.; Kowalczyk, M.; Pecio, Ł.; Nowak, P.; Stochmal, A. Yunnaneic acid B, a component of *Pulmonaria officinalis* extract, prevents peroxynitrite-induced oxidative stress in vitro. *Journal of Agricultural and Food Chemistry* **2017**, *65*, 3827-3834.
